# Supplementary material for: Smoking Cessation After Lung Cancer Diagnosis and the Risk of Second Primary Lung Cancer: The Multiethnic Cohort Study
Source: PubMed Central journal article supplement — JNCI Cancer Spectr. 2021 Aug 23;5(5):pkab076. doi: 10.1093/jncics/pkab076 (PMC8487318; doi:10.1093/jncics/pkab076), 2021-08-23

# Supplementary Material

## Table of Contents

### **Supplementary Tables**

- Supplementary Table 1. Missing count and rates of variables in study population.
- Supplementary Table 2. Population characteristics stratified by missing status of IPLC stage.
- Supplementary Table 3. Univariate logistic analysis of factors associated with smoking cessation at 10-year follow-up.
- Supplementary Table 4. Sensitivity analysis for multivariate logistic regression of smoking cessation using covariates selected after multiple testing adjustment (with  $P < 0.005$ ) in univariable logistic analysis.
- Supplementary Table 5. Sensitivity analysis for multivariate logistic regression of smoking cessation when limiting those with IPLC diagnosis between baseline and 10-year follow-up to only those whose diagnosis occurred within 5 years from baseline assessment.
- Supplementary Table 6. Complete case analysis for cause-specific hazard regression of the risk of second primary lung cancer with associated factors.

### **Supplementary Figures**

- Supplementary Figure 1. Adjusted odds ratios for evaluating an association between initial primary lung cancer (IPLC) diagnosis and smoking cessation based on subgrouping by (a) smoking pack-years and (b) age category.
- Supplementary Figure 2. Time distribution from cohort enrollment to diagnosis of initial primary lung cancer (IPLC) (N=982), and from IPLC diagnosis to second primary lung cancer (SPLC) diagnosis (N=33).

## Supplementary Tables

Supplementary Table 1. Missing count and rates of variables in primary study population.<sup>a</sup>

| Variables                                             | Missing counts<br>(Missing rates, %) |
|-------------------------------------------------------|--------------------------------------|
| IPLC stage at initial diagnosis                       | 48 (4.86)                            |
| IPLC diagnosis between baseline and 10-year follow-up | 11 (1.11)                            |
| Baseline pack-years                                   | 5 (0.51)                             |
| BMI                                                   | 2 (0.02)                             |
| Baseline cigarettes per day                           | 2 (0.02)                             |
| Education                                             | 2 (0.02)                             |
| Race                                                  | 0 (0.0)                              |
| Family history                                        | 0 (0.0)                              |
| Prior history of cancer                               | 0 (0.0)                              |
| Age at baseline                                       | 0 (0.0)                              |
| Sex                                                   | 0 (0.0)                              |

<sup>a</sup> IPLC = initial primary lung cancer, BMI = body mass index.

Supplementary Table 2. Population characteristics stratified by missing status of IPLC stage. <sup>a</sup>

| Variable                               | Overall       | No missing IPLC stage <sup>b</sup> | Missing IPLC stage <sup>b</sup> | P <sup>d</sup> |
|----------------------------------------|---------------|------------------------------------|---------------------------------|----------------|
| Total, No. (%)                         | 986           | 938 (95.1)                         | 48 (4.9)                        |                |
| Age at baseline, mean (SD)             | 59.55 (7.23)  | 59.72 (7.24)                       | 61.96 (6.77)                    | 0.02           |
| BMI (kg/m <sup>2</sup> ), mean (SD)    | 25.66 (5.00)  | 25.68 (4.97)                       | 25.2 (5.56)                     | 0.53           |
| Male sex, No. (%)                      | 527 (53.4)    | 501 (53.4)                         | 26 (54.2)                       | 1.00           |
| Education, No. (%)                     |               |                                    |                                 | 0.38           |
| High school or less                    | 460 (46.7)    | 434 (46.4)                         | 26 (54.2)                       |                |
| Some college or graduate               | 423 (43.0)    | 407 (43.5)                         | 16 (33.3)                       |                |
| Postgraduate                           | 101 (10.3)    | 95 (10.1)                          | 6 (12.5)                        |                |
| Family history of lung cancer, No. (%) | 81 (8.2)      | 81 (8.64)                          | 0 (0)                           | 0.06           |
| Prior history of cancer, No. (%)       | 226 (22.9)    | 212 (22.6)                         | 14 (29.2)                       | 0.38           |
| Pack-years, mean (SD)                  | 31.50 (16.21) | 31.46 (16.25)                      | 32.40 (15.56)                   | 0.70           |
| Cigarettes/day, mean (SD)              | 17.86 (7.84)  | 17.87 (7.85)                       | 17.65 (7.65)                    | 0.85           |
| Race, No. (%)                          |               |                                    |                                 | 0.05           |
| White                                  | 236 (23.9)    | 222 (23.7)                         | 14 (29.2)                       |                |
| African American                       | 231 (23.4)    | 223 (23.8)                         | 8 (16.7)                        |                |
| Japanese American                      | 232 (23.5)    | 222 (23.7)                         | 10 (20.8)                       |                |
| Latino                                 | 137 (13.9)    | 124 (13.2)                         | 13 (27.0)                       |                |
| Native Hawaiian                        | 117 (11.9)    | 114 (12.2)                         | 3 (6.3)                         |                |
| Other                                  | 33 (3.3)      | 33 (3.52)                          | 0 (0)                           |                |
| IPLC diagnosis, No. (%)                |               |                                    |                                 | 0.22           |
| No                                     | 826 (83.6)    | 771 (83.2)                         | 44 (91.7)                       |                |
| Yes <sup>d</sup>                       | 160 (16.4)    | 156 (16.8)                         | 4 (8.3)                         |                |

<sup>a</sup> Based on N=986 patients who were (i) active smokers at baseline, (ii) had 10-year follow-up information, and (iii) were diagnosed with IPLC between 1993-2017. SD = standard deviation, BMI = body mass index, IPLC = initial primary lung cancer.

<sup>b</sup> Smoking-related variables were measured at baseline and updated with 10-year follow-up data prior to lung cancer diagnosis.

<sup>c</sup> P-value was calculated across smoking cessation stratum using the chi-square test for categorical data and the t-test for continuous data. All statistical tests were 2-sided.

<sup>d</sup> IPLC diagnosis between baseline (1993-1996) and 10-year follow-up (2003-2008).

Supplementary Table 3. Univariate logistic analysis of factors associated with smoking cessation at 10-year follow-up.<sup>a</sup>

| Variables                          | OR <sup>b</sup> (95% CI) | P <sup>c</sup> |
|------------------------------------|--------------------------|----------------|
| IPLC diagnosis                     |                          |                |
| No                                 | 1.00 (Ref)               |                |
| Yes <sup>d</sup>                   | 5.04 (3.34, 7.70)        | <0.001         |
| BMI (kg/m <sup>2</sup> )           | 0.95 (0.93, 0.98)        | <0.001         |
| Age at baseline (years)            | 1.03 (1.01, 1.05)        | <0.001         |
| Smoking intensity (Cigarettes/day) | 0.96 (0.94, 0.97)        | <0.001         |
| Smoking Pack-years                 | 0.98 (0.97, 0.99)        | <0.001         |
| Family history of lung cancer      |                          |                |
| No                                 | 1.00 (Ref)               |                |
| Yes                                | 1.70 (1.06, 2.71)        | 0.03           |
| Prior history of cancer            |                          |                |
| No                                 | 1.00 (Ref)               |                |
| Yes                                | 1.06 (0.79, 1.43)        | 0.71           |
| Sex                                |                          |                |
| Female                             | 1.00 (Ref)               |                |
| Male                               | 0.98 (0.76, 1.26)        | 0.86           |
| Education                          |                          |                |
| High school or less                | 1.00 (Ref)               |                |
| Some college or graduate           | 0.95 (0.73, 1.24)        | 0.71           |
| Postgraduate                       | 0.91 (0.59, 1.40)        | 0.67           |
| Race                               |                          |                |
| White                              | 1.00 (Ref)               |                |
| African American                   | 0.79 (0.55, 1.14)        | 0.22           |
| Japanese American                  | 0.95 (0.66, 1.37)        | 0.79           |
| Latino                             | 0.82 (0.54, 1.25)        | 0.35           |
| Native Hawaiian                    | 0.60 (0.38, 0.94)        | 0.03           |
| Other                              | 1.45 (0.68, 3.09)        | 0.33           |

<sup>a</sup> Based on N=986 patients who were (i) active smokers at baseline, (ii) had 10-year follow-up information, and (iii) were diagnosed with IPLC between 1993-2017. OR = odds ratio, CI = confidence interval, IPLC = initial primary lung cancer, BMI = body mass index

<sup>b</sup> Based on N=986 patients who were (i) current smokers at baseline, (ii) had 10-year follow-up information, and (iii) were diagnosed with IPLC between 1993-2017.

<sup>c</sup> P-value was calculated using the 2-sided Wald test.

<sup>d</sup> IPLC diagnosis between baseline (1993-1996) and 10-year follow-up (2003-2008).

Supplementary Table 4. Sensitivity analysis for multivariate logistic regression of smoking cessation using covariates selected after multiple testing adjustment (with  $P < 0.005$ ) in univariable logistic analysis.<sup>a</sup>

| Variable                 | aOR (95% CI)      | $P^b$  |
|--------------------------|-------------------|--------|
| IPLC diagnosis           |                   |        |
| No                       | 1.00 (Ref)        |        |
| Yes <sup>c</sup>         | 5.11 (3.39, 7.95) | <0.001 |
| BMI (kg/m <sup>2</sup> ) | 0.96 (0.93, 0.99) | 0.005  |
| Age at baseline (years)  | 1.03 (1.01, 1.05) | 0.003  |
| Pack-years               | 0.98 (0.97, 0.99) | <0.001 |

<sup>a</sup> Based on N=986 patients who were (i) current smokers at baseline, (ii) had 10-year follow-up information, and (iii) were diagnosed with IPLC between 1993-2017. aOR = adjusted odds ratio, CI = confidence interval, IPLC = initial primary lung cancer, BMI = body mass index.

<sup>b</sup> P-value was calculated using the 2-sided Wald test.

<sup>c</sup> IPLC between baseline (1993-1996) and 10-year follow-up (2003-2008).

Supplementary Table 5. Sensitivity analysis for multivariate logistic regression of smoking cessation when limiting those with IPLC diagnosis between baseline and 10-year follow-up to only those whose diagnosis occurred within 5 years from baseline assessment.<sup>a</sup>

| Variable                          | aOR (95% CI)       | P <sup>b</sup> |
|-----------------------------------|--------------------|----------------|
| IPLC diagnosis (%)                |                    |                |
| No                                | 1.00 (Ref)         |                |
| Yes <sup>c</sup>                  | 7.14 (3.80, 14.68) | <0.001         |
| BMI (kg/m <sup>2</sup> )          | 0.97 (0.94, 1.00)  | 0.06           |
| Age at baseline (years)           | 1.03 (1.01, 1.05)  | 0.003          |
| Pack-years                        | 0.97 (0.96, 0.98)  | <0.001         |
| Family history of lung cancer (%) |                    |                |
| No                                | 1.00 (Ref)         |                |
| Yes                               | 1.93 (1.15, 3.31)  | 0.01           |
| Race (%)                          |                    |                |
| White                             | 1.00 (Ref)         |                |
| African American                  | 0.65 (0.42, 1.01)  | 0.06           |
| Japanese American                 | 0.86 (0.57, 1.30)  | 0.48           |
| Latino                            | 0.59 (0.35, 0.97)  | 0.04           |
| Native Hawaiian                   | 0.50 (0.29, 0.85)  | 0.01           |
| Other                             | 1.07 (0.46, 2.56)  | 0.88           |

<sup>a</sup> Based on N=893 patients who were (i) current smokers at baseline, (ii) had 10-year follow-up information, and (iii) were diagnosed with IPLC between 1993-2017. aOR = adjusted odds ratio, CI = confidence interval, IPLC = initial primary lung cancer, BMI = body mass index

<sup>b</sup> P-value was calculated using the 2-sided Wald test.

<sup>c</sup> IPLC diagnosis between baseline (1993-1996) and 5-year follow-up (1998-2001).

Supplementary Table 6. Complete-case analysis for cause-specific hazard regression of the risk of second primary lung cancer with associated factors.<sup>a</sup>

| Variable                         | aHR (95% CI)      | P <sup>b</sup> |
|----------------------------------|-------------------|----------------|
| Smoking cessation <sup>c</sup>   |                   |                |
| No (Current-current)             | 1.00 (Ref)        |                |
| Yes (Current-former)             | 0.25 (0.11, 0.55) | <0.001         |
| Age at initial diagnosis (years) | 1.00 (0.95, 1.05) | 0.98           |
| Stage at initial diagnosis       |                   |                |
| Early (I-III)                    | 1.00 (Ref)        |                |
| Advanced (IV)                    | 0.56 (0.18, 1.71) | 0.31           |
| IPLC histology                   |                   |                |
| NSCLC                            | 1.00 (Ref)        |                |
| SCLC                             | 0.46 (0.06, 3.49) | 0.45           |
| Other                            | 1.04 (0.30, 3.60) | 0.95           |

<sup>a</sup> Based on N=934 patients who were (i) current smokers at baseline, (ii) had 10-year follow-up information, (iii) were diagnosed with IPLC between 1993-2017 and (iv) had complete data for all variables. aHR = adjusted hazard ratio, CI = confidence interval, IPLC = initial primary lung cancer, NSCLC = Non-small cell lung cancer, SCLC = small cell lung cancer.

<sup>b</sup> P-value was calculated using the 2-sided Wald test.

<sup>c</sup> Surveyed at baseline and 10-year follow-up.

## Supplementary Figures

**Supplementary Figure 1.** Adjusted odds ratios for evaluating an association between initial primary lung cancer (IPLC) diagnosis and smoking cessation based on subgrouping by **A)** smoking pack-years and **B)** age category. The model was adjusted for family history, body mass index, smoking pack-years, and race. Error bars represent the 95% confidence intervals (CIs). aOR = adjusted odds ratio.

**A**

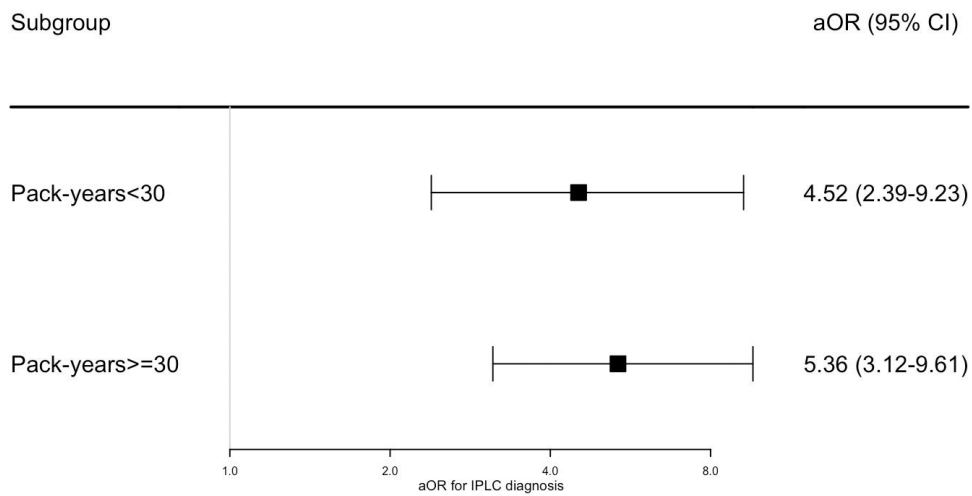

**B**

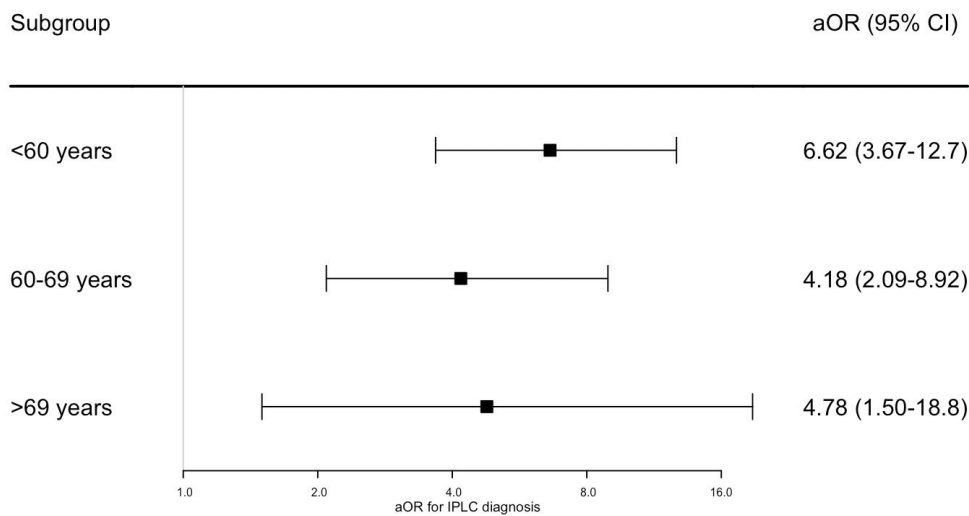



**Supplementary Figure 2.** Time distribution from cohort enrollment to diagnosis of **A)** initial primary lung cancer (IPLC) (N=982), and from IPLC diagnosis to **B)** second primary lung cancer (SPLC) diagnosis (N=33).

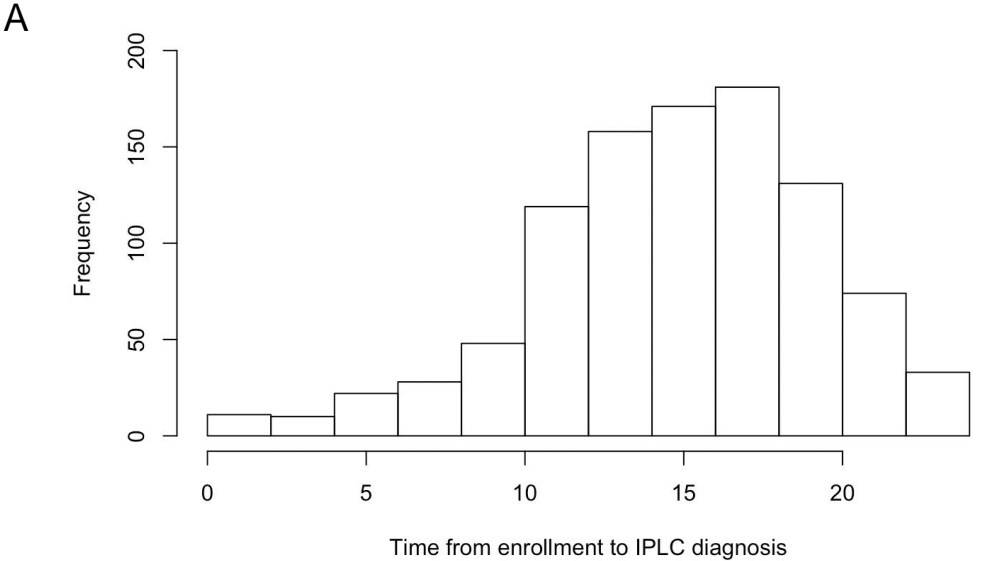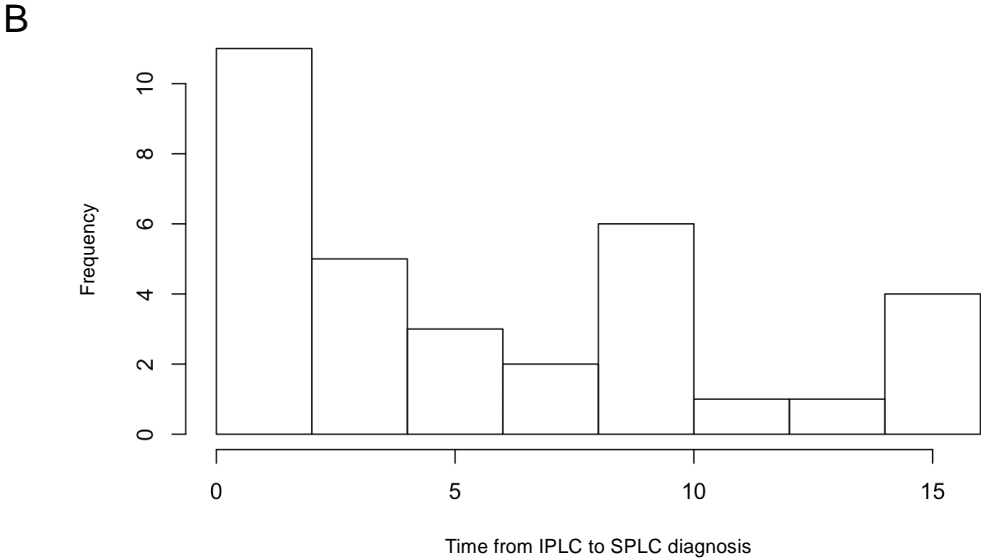

Supplement: pkab076_supplementary_data.pdf [file pkab076_supplementary_data.pdf]
